# Supplementary material for: Facile synthesis of a 2,5-dihydroxyterephthalic acid-based charge transfer cocrystal for photoelectric applications
Source: Royal Society of Chemistry journal article supplement (doi:10.1039/d4ce00338a), 2024-01-01
Supplement: d4ce00338a1.pdf [file d4ce00338a1.pdf]

## Electronic Supporting Information

### Facile synthesis of 2,5-dihydroxyterephthalic acid-based charge transfer cocrystal for photoelectric applications

Pei-Pei Yin,<sup>a,b</sup> Yu-E Chen,<sup>b</sup> Jia-Wei Diao,<sup>b</sup> Yi-Yang Cheng,<sup>b</sup> Xiao-Gang Yang,<sup>b\*</sup> Bao-Zhong  
Liu<sup>a\*</sup> and Lu-Fang Ma,<sup>a,b</sup>

<sup>a</sup>*College of Chemistry and Chemical Engineering, Henan Polytechnic University, Jiaozuo, 454000,  
P. R. China.*

<sup>b</sup>*College of Chemistry and Chemical Engineering, Luoyang Normal University, Henan Province  
Function-Oriented Porous Materials Key Laboratory, Luoyang 471934, P. R. China.*

\*Corresponding Author

E-mail: bzliu@hpu.edu.cn; yxg2233@126.com

## **A. Experimental Section.**

### **1. Materials and general procedures.**

Without additional purification, all of the chemicals were of analytical grade and were acquired from commercial sources. Powder X-ray diffraction analysis (PXRD) patterns were collected using Cu K radiation ( $\lambda = 1.5418 \text{ \AA}$ ) on a Bruker D8-ADVANCE X-ray diffractometer. Measurements were performed in a  $2\theta$  range of  $5\text{--}50^\circ$  at room temperature, with steps of  $0.02^\circ$  ( $2\theta$ ) and counting intervals of 0.2 s/step. 40 KV and 40 mA of operational power were used. The C, H, and N elements were analyzed using a Perkin-Elmer 240 elemental analyzer. FT-IR spectrometer by incorporating the samples in KBr disks. Elemental analyses for carbon, hydrogen and nitrogen atoms were performed on a Vario EL III elemental analyzer. Thermogravimetric analysis (TGA) experiments were carried out using SII EXStar6000 TG/DTA6300 thermal analyzer from room temperature to  $800 \text{ }^\circ\text{C}$  under a nitrogen atmosphere at a heating rate of  $10 \text{ }^\circ\text{C min}^{-1}$ . An UV-3600 plus UV-vis-NIR spectrophotometer from Shimadzu was used to analyze UV-vis absorption spectra. In order to obtain room temperature photoluminescence (PL) spectra and time-resolved lifetime measurements, an Edinburgh FLS1000 fluorescence spectrometer equipped with a xenon arc lamp (Xe900) and a nanosecond flash-lamp (nF900) was used.

Optoelectronic measurements were performed with a CHI 660E electrochemical workstation (CH Instruments, Chenhua Co., Shanghai, China) by using Phen-DTPA modified indium tin oxide (ITO) as the working electrode (working area  $1.0 \text{ cm}^2$ ), Ag/AgCl as a reference electrode, platinum wire electrode as a counter electrode. All electrochemical tests were performed at room temperature in  $0.5 \text{ M Na}_2\text{SO}_4$  solution. The system was conducted in a quartz glass reactor about  $50 \text{ cm}^3$ , and irradiated by a  $300 \text{ W Xe}$  lamp. All the cyclic voltammograms (CV) with a scan rate of  $50 \text{ mV/s}$ , electrochemical impedance spectroscopy (EIS) measurements recorded at the

potential of 0 and -0.5 V potential in the frequency range of 100 kHz to 100 mHz. Transient photocurrent responses with the on-off cycle's illumination and constant potential electrolysis curves with bias potential of 0 and -0.5 V were tested in three-electrode system at ambient pressure and room temperature.

## 2. Synthesis of Phen-DTPA

Upon mixing equimolar (0.1 mmol) ethanol solutions (2 mL) of DTPA and Phen, light-yellow layered crystals of Phen-DTPA can be obtained in a few minutes. Elemental analysis calcd. (%) for C<sub>20</sub>H<sub>14</sub>N<sub>2</sub>O<sub>6</sub>: C 63.49, H 3.73, N 7.40; Found: C 62.92, H 3.91, N 7.73.

## 3. X-ray crystal structure

Single-crystal X-ray diffraction data for Phen-DTPA was collected at room temperature (293K) on an Oxford Diffraction SuperNova area-detector diffractometer using mirror optics monochromated Mo K $\alpha$  radiation ( $\lambda = 0.71073 \text{ \AA}$ ). CrysAlisPro<sup>1</sup> was used for the data collection, data reduction and empirical absorption correction. The crystal structure were solved by direct methods, using SHELXS-2014 and least-squares refined with SHELXL-2014 using anisotropic thermal displacement parameters for all non-hydrogen atoms.<sup>2</sup> The crystallographic data for **1** are listed in Table S1 and 2. The CIF file of **1** (CCDC No. 2340776) can be downloaded free of charge via <http://www.ccdc.cam.ac.uk/conts/retrieving.html>.

## 4. Preparation of working electrode

The ITO (1  $\times$  4 cm<sup>2</sup>) substrate was washed by ethanol, and water under ultrasonic processing for about 30 min then dried in natural environment. The powder of the cocrystal complex (10 mg) were added into 1 mL anhydrous ethanol and ultrasonicated for 30 min to form suspension liquid.

The working electrodes were prepared by

dropping the above suspension (0.2 mL) onto the surface of the pre-treated ITO by controlling the coating area about 1 cm<sup>2</sup>, and allowing it to dry at room temperature.

## **5. Fabrication of LED device**

The powder of the Phen-DTPA cocrystal complex (20 mg) was evenly dispersed in epoxy resin. The mixture was coated on a commercial 365 nm diode chip attached with two electrode, then heated at 100 °C for 1 hour.

## **6. Theoretical calculations.**

The density functional theory (DFT) calculations were performed based on the crystallographic information file (cif) of the title complex. Perdew-Wang (PW91)<sup>5</sup> generalized gradient approximation (GGA) method was used for the full optimization of initial configuration. The self-consistent field (SCF) converged criterion was within  $1.0 \times 10^{-5}$  hartree atom<sup>-1</sup> and the converging criterion of the structure optimization was  $1.0 \times 10^{-3}$  hartree bohr<sup>-1</sup>.

The density functional theory (DFT) and charge density distribution were carried out using Dmol3<sup>3</sup> and CASTEP<sup>4</sup> module in Material Studio software package<sup>5</sup>, respectively. The DFT calculations were calculated by the crystallographic information file (cif) of Phen-DTPA directly. While the calculations for CASTEP were performed by removing the symmetry of the crystallographic information file (cif) for the cocrystal. Perdew-Wang (PW91)<sup>5</sup> generalized gradient approximation (GGA) method was used for the full optimization of initial configuration. The self-consistent field (SCF) converged criterion was within  $1.0 \times 10^{-5}$  hartree atom<sup>-1</sup> and the converging criterion of the structure optimization was  $1.0 \times 10^{-3}$  hartree bohr<sup>-1</sup>.

## B. Supporting Figures

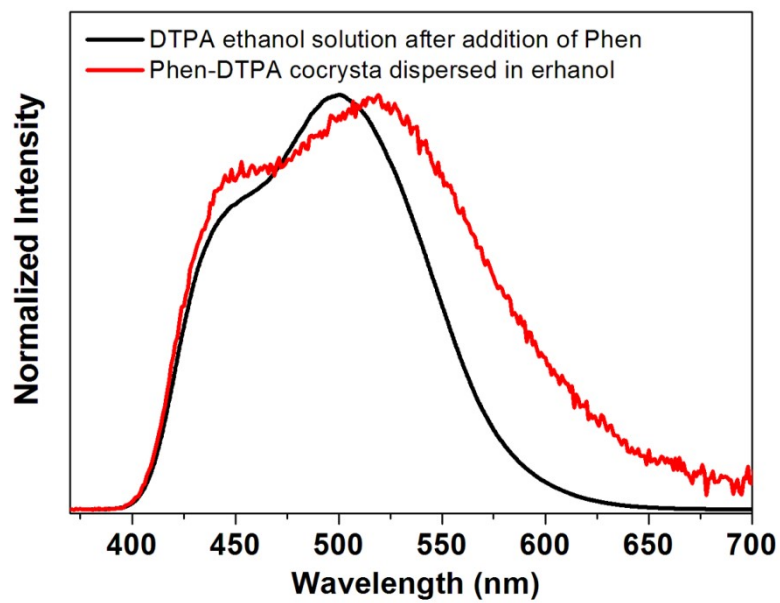

**Figure S1.** Normalized fluorescence spectra of DTPA ethanol solution after addition of Phen (black) and Phen-DTPA cocrystal dispersed in ethanol.

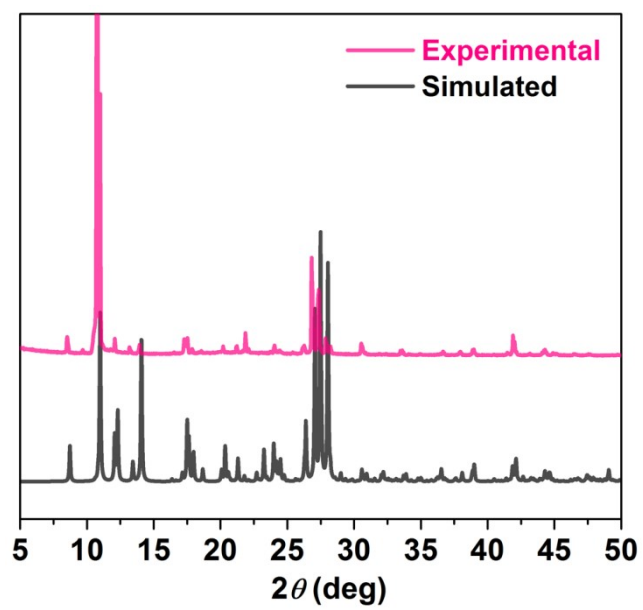

**Figure S2.** Powder X-ray diffraction patterns (PXRD) of the simulated (black) and as-synthesized (red) title Phen-DTPA cocrystal.

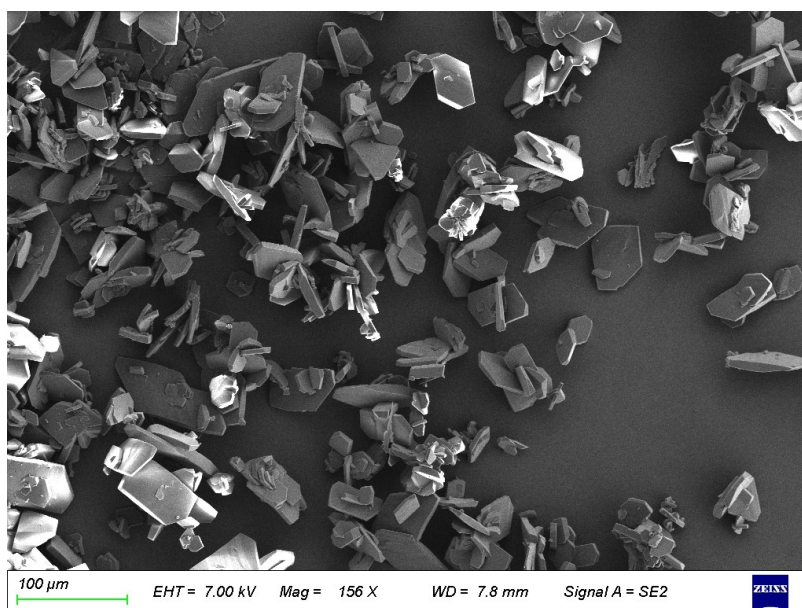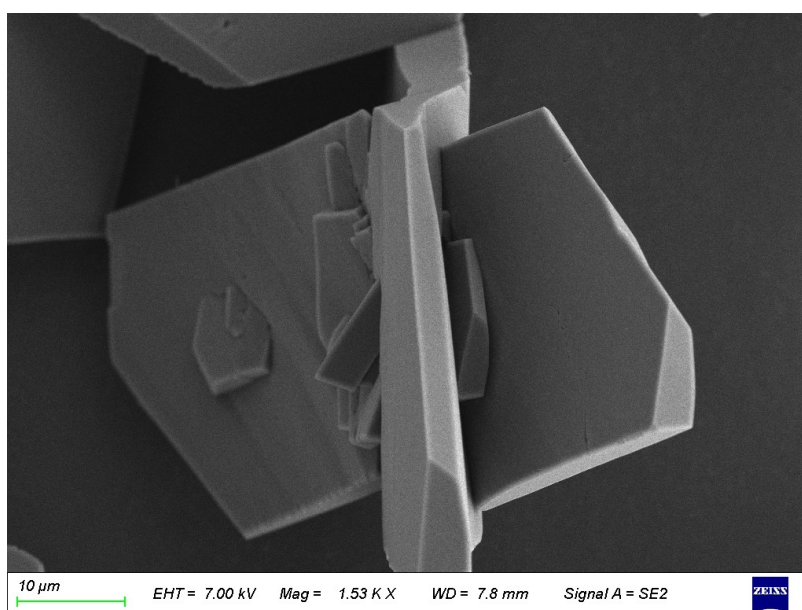

**Figure S3.** SEM images of the as-prepared Phen-DTPA cocrystal.

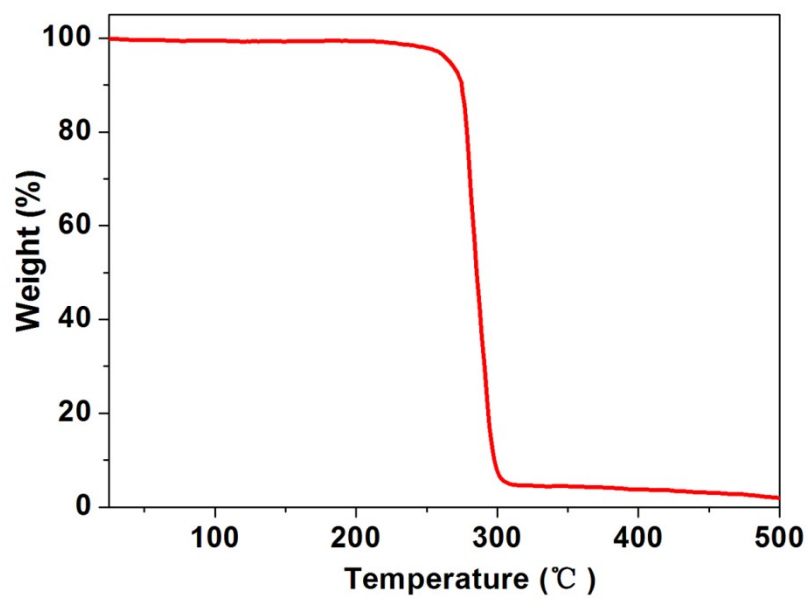

**Figure S4.** Thermogravimetric analysis (TGA) curve of Phen-DTPA.



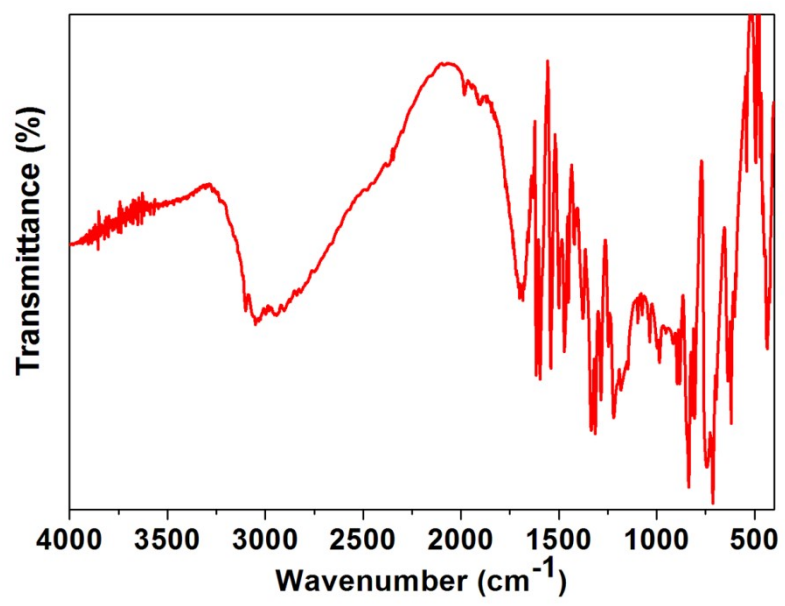

**Figure S5.** FT-IR spectrum of Phen-DTPA.

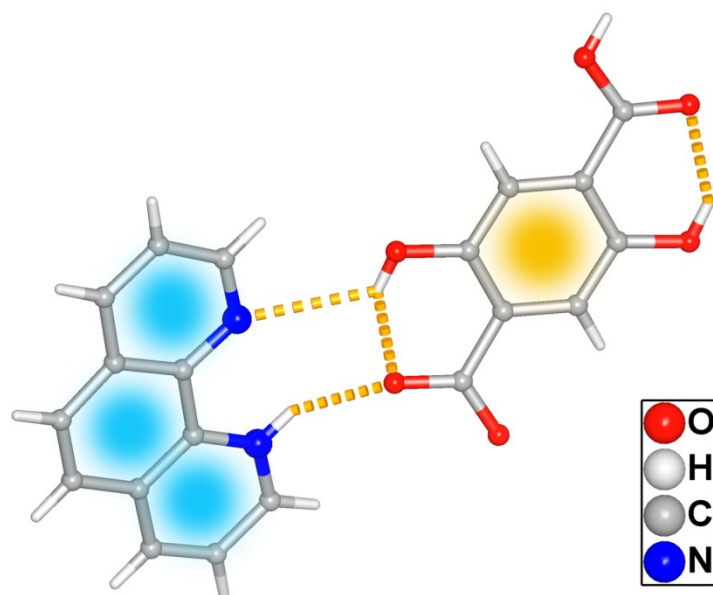

**Figure S6.** View of the asymmetric unit of Phen-DTPA showing inter- and intra-molecular hydrogen bonds.

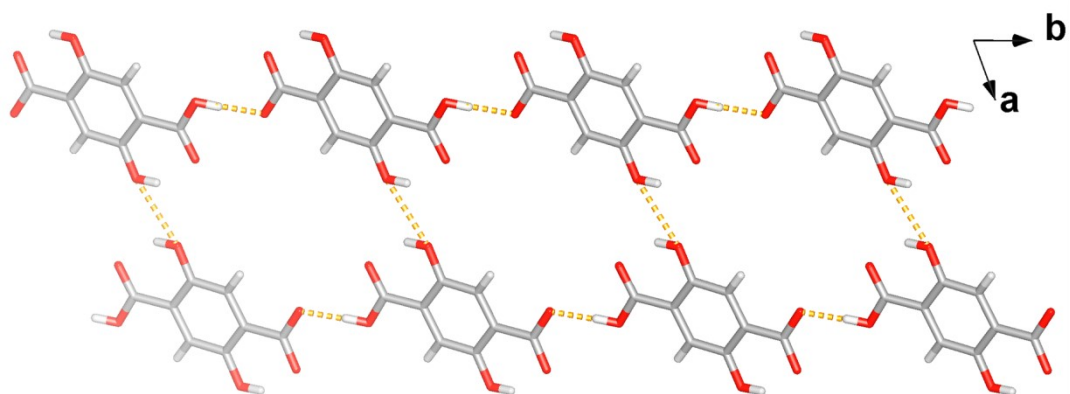

**Figure S7.** View of 1D chain along *b* direction consisting O-H $\cdots$ O hydrogen bonds interactions between DTPA molecules.

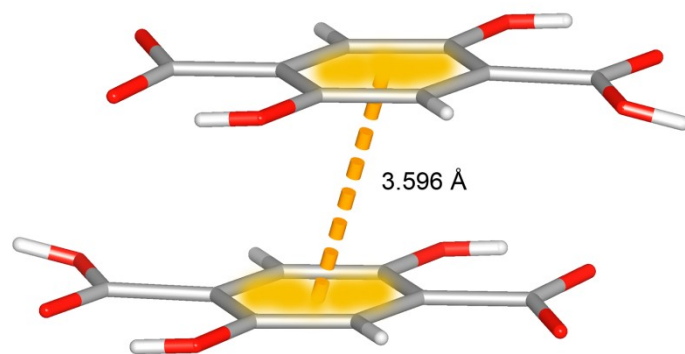

**Figure S8.**  $\pi\cdots\pi$  interactions between the phenyl ring of DTPA.

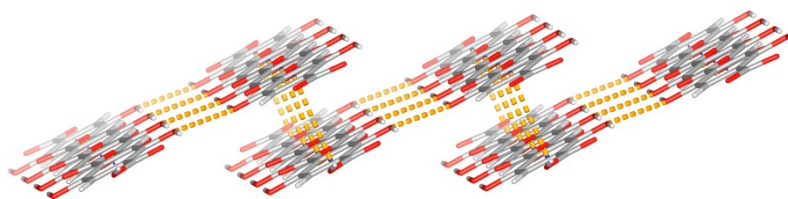

(a)

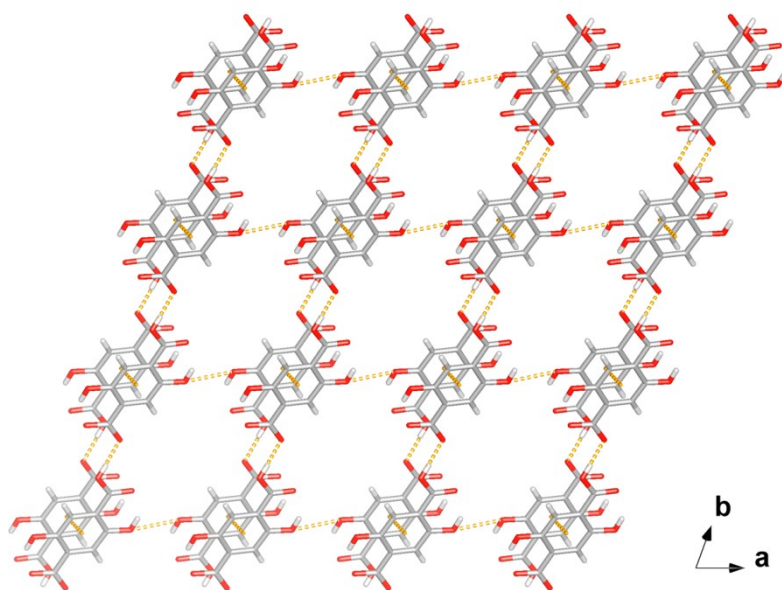

(b)

**Figure S9.** View of 2D double layer along  $b$  (a) and  $c$  (b) direction via inter-chain  $\pi\cdots\pi$  interactions between the phenyl ring of DTPA.

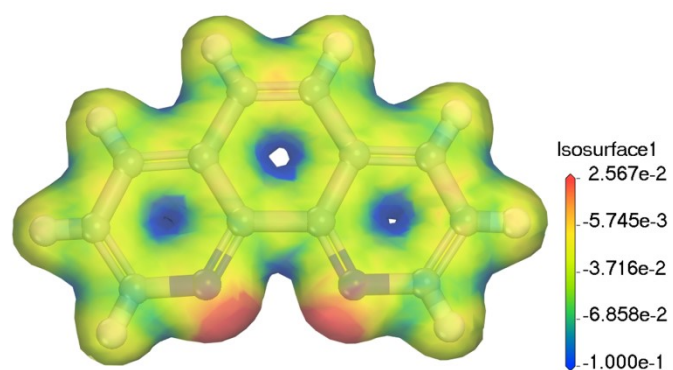

(a)

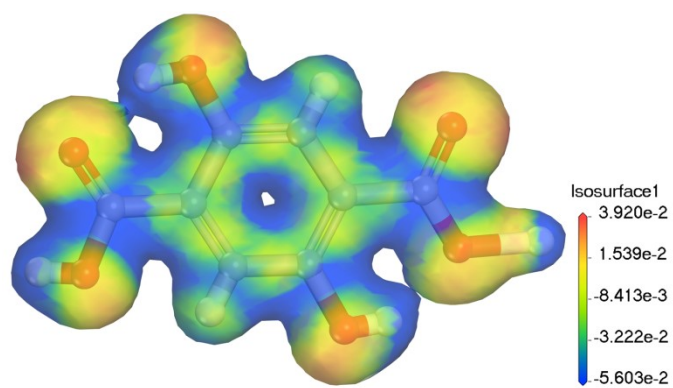

(b)

**Figure S10.** Electron density distribution of Phen (a) and DTPA (b). Red and blue iso-surface presents electron accumulation and depletion, respectively.

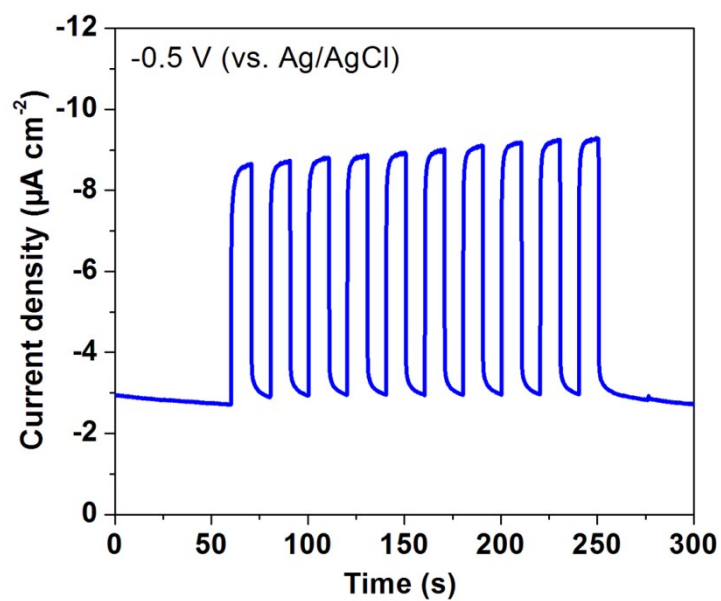

(a)

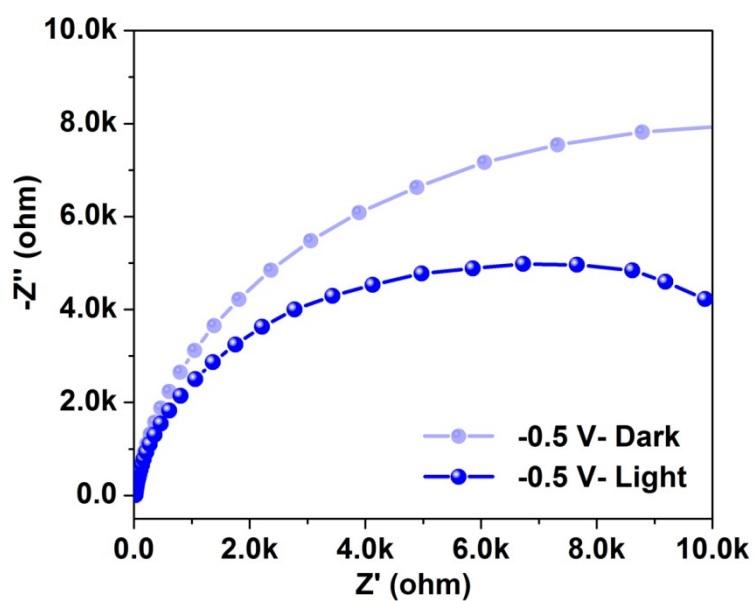

(b)

**Figure S11.** (a) Transient current density-time curve of Phen-DTPA under -0.5 V bias potential. (b) Electrochemical impedance spectroscopy (EIS) Nyquist plots of Phen-DTPA under light and dark states with the addition of -0.5 V bias potential.

## C. Supporting Table

**Table S1.** Crystallographic data and experimental details for **Phen-DTPA**.

| Sample                                                           | Phen-DTPA                                                     |
|------------------------------------------------------------------|---------------------------------------------------------------|
| Chemical formula                                                 | C <sub>20</sub> H <sub>14</sub> N <sub>2</sub> O <sub>6</sub> |
| Formula weight                                                   | 378.33                                                        |
| Crystal system                                                   | triclinic                                                     |
| Space group                                                      | <i>P</i> $\bar{1}$                                            |
| <i>a</i> (Å)                                                     | 9.0499(8)                                                     |
| <i>b</i> (Å)                                                     | 9.5985(10)                                                    |
| <i>c</i> (Å)                                                     | 11.2088(11)                                                   |
| <i>V</i> (Å <sup>3</sup> )                                       | 808.51(16)                                                    |
| <i>α</i> /°                                                      | 64.656(10)                                                    |
| <i>β</i> /°                                                      | 78.043(8)                                                     |
| <i>γ</i> /°                                                      | 66.903(9)                                                     |
| <i>Z</i>                                                         | 2                                                             |
| <i>D</i> (g cm <sup>-3</sup> )                                   | 1.554                                                         |
| <i>μ</i> (mm <sup>-1</sup> )                                     | 0.117                                                         |
| <i>T</i> (K)                                                     | 293(2)                                                        |
| <i>R</i> <sub>int</sub>                                          | 0.0244                                                        |
| Goof                                                             | 1.058                                                         |
| <i>R</i> <sub>1</sub> <sup>a</sup> ( <i>I</i> > 2σ( <i>I</i> ))  | 0.0594                                                        |
| <i>wR</i> <sub>2</sub> <sup>b</sup> ( <i>I</i> > 2σ( <i>I</i> )) | 0.0869                                                        |

$${}^aR_1 = \Sigma(|F_o| - |F_c|) / \Sigma|F_o|; {}^b wR_2 = [\Sigma w(|F_o|^2 - |F_c|^2)^2 / \Sigma w(F_o^2)^2]^{1/2}$$



## D. Supporting References

1. CrysAlisPro, Rigaku Oxford Diffraction, Version 1.171.39.6a.
2. (a) G. M. Sheldrick, *Acta Crystallogr. Sect. A* 2008, **64**, 112; (b) G. M. Sheldrick, *Acta Cryst.* 2015, **A71**, 3–8.
3. B. Delley, *J. Chem. Phys.* 2000, **113**, 7756–7764.
4. S. J. Clark, M. D. Segall, C. J. Pickard, P. J. Hasnip, M. J. Probert, K. Refson, M. C. Payne, *Zeitschrift für Kristallographie* 2005, **220**, 567–570.
5. B. Delley, *J. Chem. Phys.* 1990, **92**, 508–517.
